# Supplementary material
Source: PubMed Central journal article supplement (PMC3837946)
Supplement: JB.00681-13_zjb999092912so1.pdf [file JB.00681-13_zjb999092912so1.pdf]

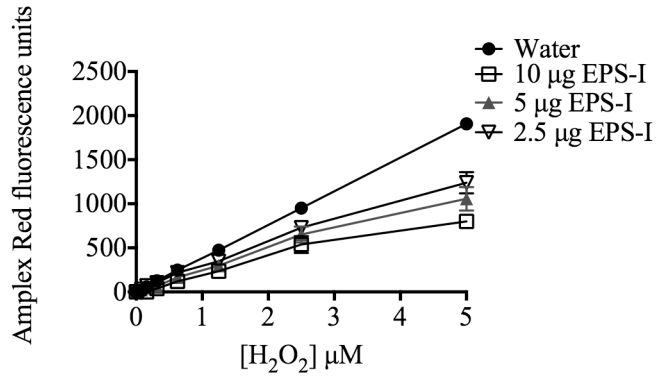

**Supplemental Figure S1. Exopolysaccharides decrease H<sub>2</sub>O<sub>2</sub> in a concentration dependent way.** The amount of H<sub>2</sub>O<sub>2</sub> detected by Amplex Red when incubated with 10 μg EPS-I (open squares); 5 μg EPS-II (triangles); or 2.5 μg EPS-I (open inverted triangles). Error bars indicate standard deviation (not visible in all data points due to small error).

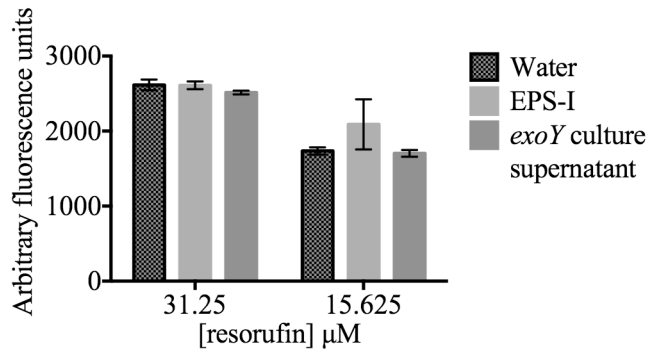

**Supplemental Figure S2. Exopolysaccharides do not interfere with detection of resorufin fluorescence.** The amount of resorufin fluorescence detected when incubated with water, 7 μg EPS-I, or *exoY* culture supernatant. Error bars indicate standard deviation.
